# Supplementary material for: Experimental Investigation of Forchheimer Coefficients for Non-Darcy Flow in Conglomerate-Confined Aquifer
Source: Hindawi journal article supplement (doi:10.1155/2018/4209197), 2018-12-03
Supplement: f1 [file 4209197.f1.doc]

**Supplementary Material**

**1.Hydraulic gradient (J) versus discharge (*v*) curves**

The plots of hydraulic gradient versus discharge for the another four conglomerate confined aquifer media at various axial stresses are present below.

**Group 1**

**Group 2**

**Group3**

**Group4-1**

**Group 5**

**Group 6**

**2. Porosity (*n*) versus stress (*σ*) curves**
